# Supplementary material for: A solution-processed ternary copper halide thin films for air-stable and deep-ultraviolet-sensitive photodetector
Source: Royal Society of Chemistry journal article supplement (doi:10.1039/d0nr03630g), 2020-01-01
Supplement: d0nr03630g1.pdf [file d0nr03630g1.pdf]

## SUPPORTING INFORMATION

# Solution-processed ternary copper halides thin films for air-stable and deep-ultraviolet-sensitive photodetector

Wen-Qing Liang, Ying Li, Jing-Li Ma, Yue Wang, Jing-Jing Yan, Xu Chen,\* Di Wu, Yong-Tao Tian, Xin-Jian Li and Zhi-Feng Shi\*

Key Laboratory of Materials Physics of Ministry of Education, School of Physics and Microelectronics, Zhengzhou University, Daxue Road 75, Zhengzhou 450052, China

---

\*Author to whom correspondence should be addressed. Electronic mail: shizf@zzu.edu.cn; xchen@zzu.edu.cn

**Effect of annealing temperature on the crystallinity and morphology characteristics of Cs<sub>3</sub>Cu<sub>2</sub>I<sub>5</sub> thin films**

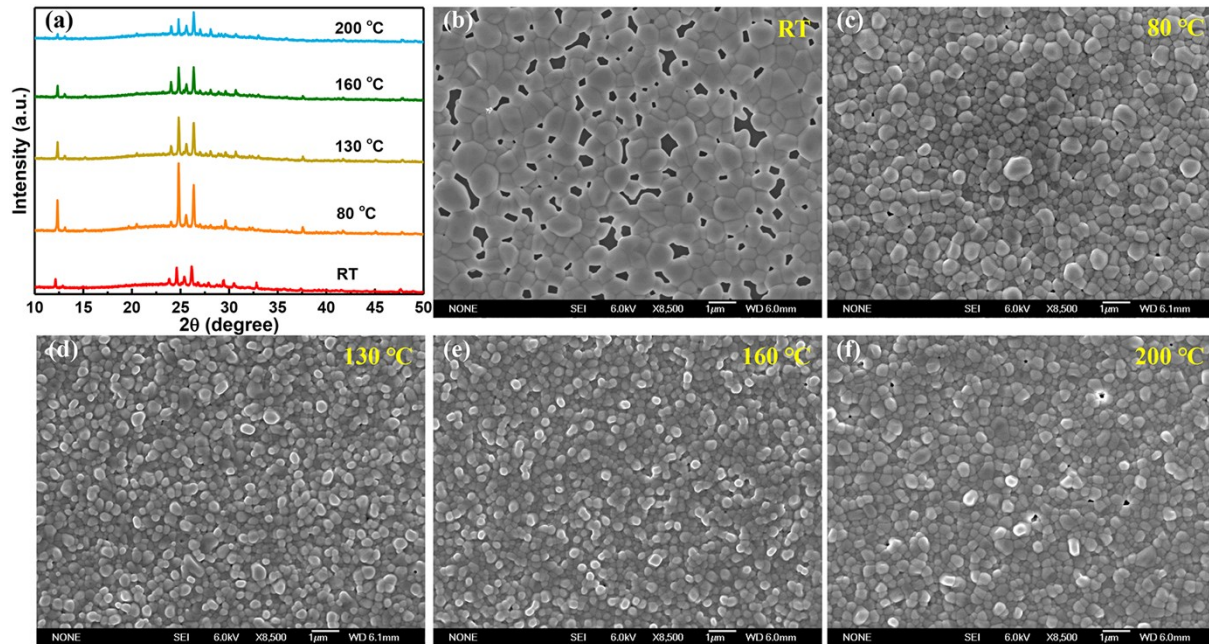

Figure S1. XRD patterns and SEM images of the Cs<sub>3</sub>Cu<sub>2</sub>I<sub>5</sub> thin films at different annealing temperatures.

**Confirmation of the thickness of the Cs<sub>3</sub>Cu<sub>2</sub>I<sub>5</sub> thin films**

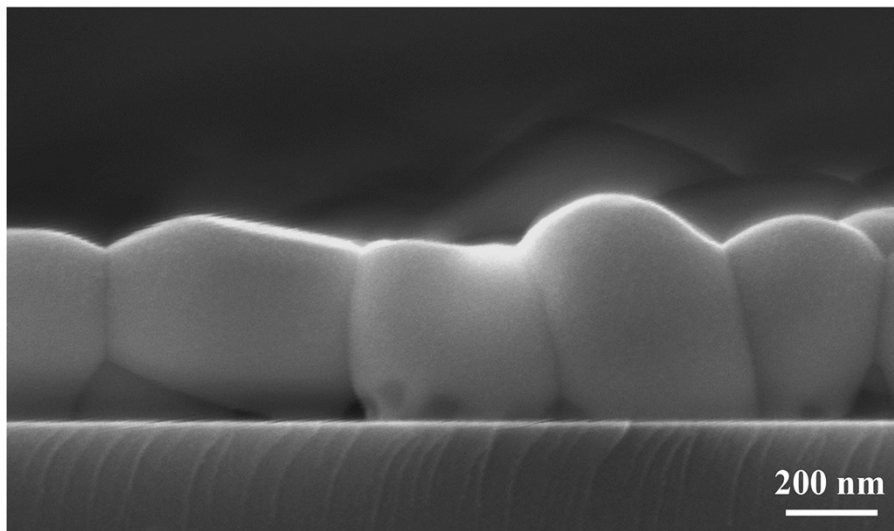

Figure S2. Cross-sectional SEM image of the Cs<sub>3</sub>Cu<sub>2</sub>I<sub>5</sub> thin films.

## Elemental compositions and distribution of the $\text{Cs}_3\text{Cu}_2\text{I}_5$ thin films

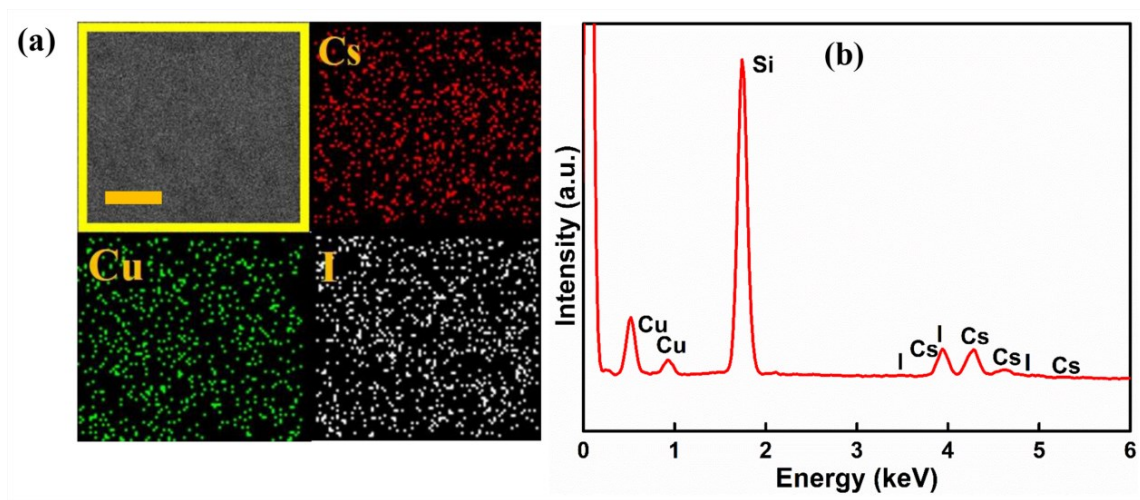

Figure S3. (a) EDS mapping of the  $\text{Cs}_3\text{Cu}_2\text{I}_5$  thin films showing the uniform distribution of Cs, Cu, and I elements. (b) EDS spectra of the  $\text{Cs}_3\text{Cu}_2\text{I}_5$  thin films, confirming the elemental composition.

## Confirmation of the photostability of the $\text{Cs}_3\text{Cu}_2\text{I}_5$ thin films

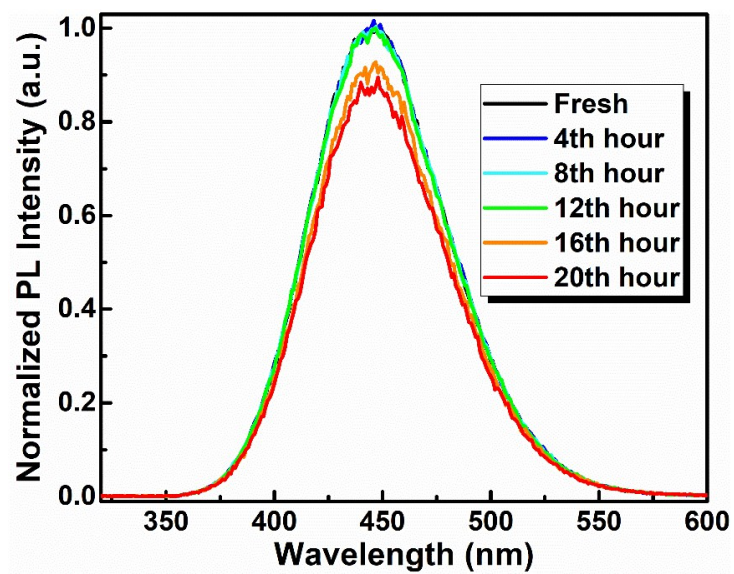

Figure S4. PL spectra of the as-grown  $\text{Cs}_3\text{Cu}_2\text{I}_5$  thin films under continuous UV light irradiation with different illumination time.

**Thermal cycling PL measurement showing the thermal stability of Cs<sub>3</sub>Cu<sub>2</sub>I<sub>5</sub> thin films**

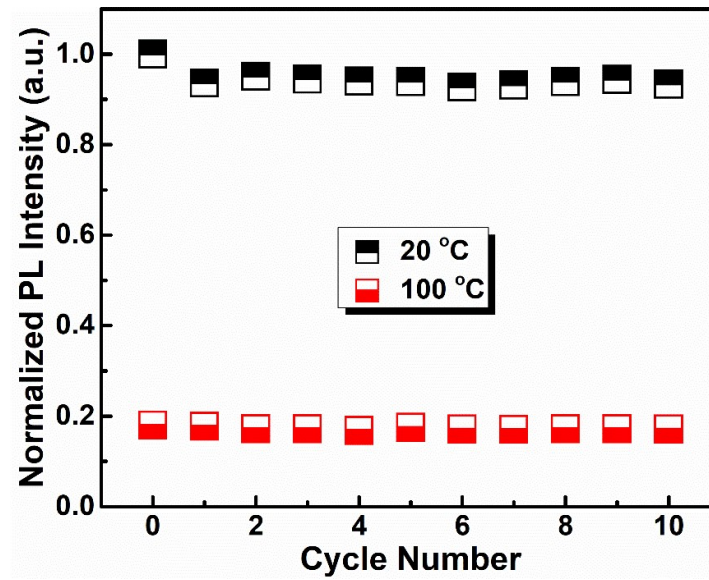

Figure S5. Integrated PL intensity of the Cs<sub>3</sub>Cu<sub>2</sub>I<sub>5</sub> thin films at two representative temperature points (20 and 100 °C) over ten cycling measurements.

**Confirmation of the good stability of the Cs<sub>3</sub>Cu<sub>2</sub>I<sub>5</sub> thin films after ten heating/cooling cycles treatment**

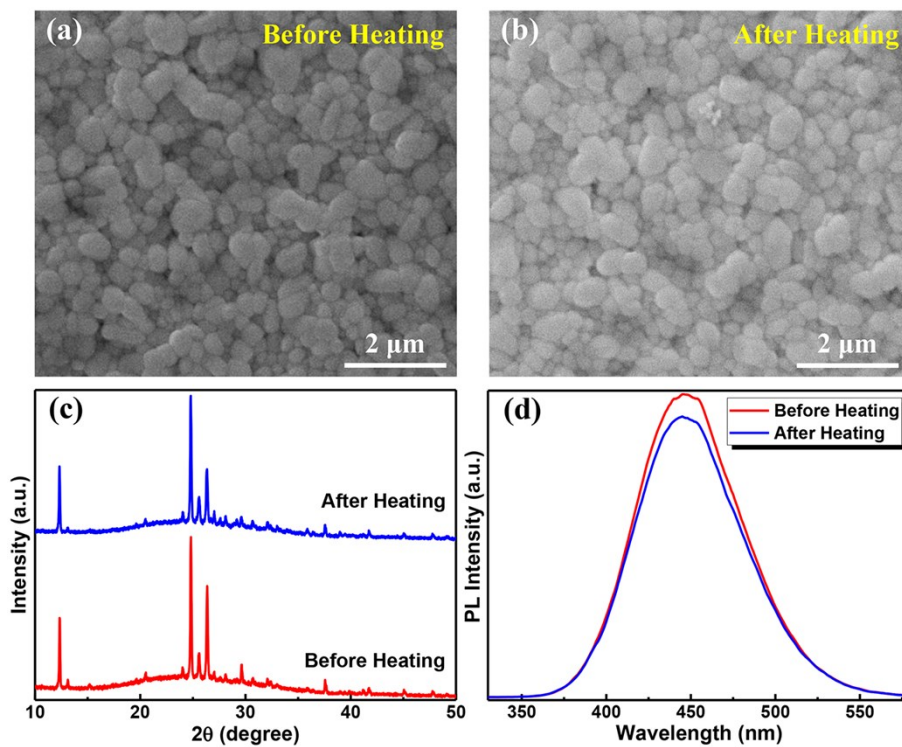

Figure S6. Comparisons of the (a, b) SEM images, (c) XRD patterns, and (d) PL spectra of the Cs<sub>3</sub>Cu<sub>2</sub>I<sub>5</sub> thin films before and after ten heating/cooling cycling PL measurements.

**Photoresponse characteristics of the photodetector under pulsed light illumination at different frequencies**

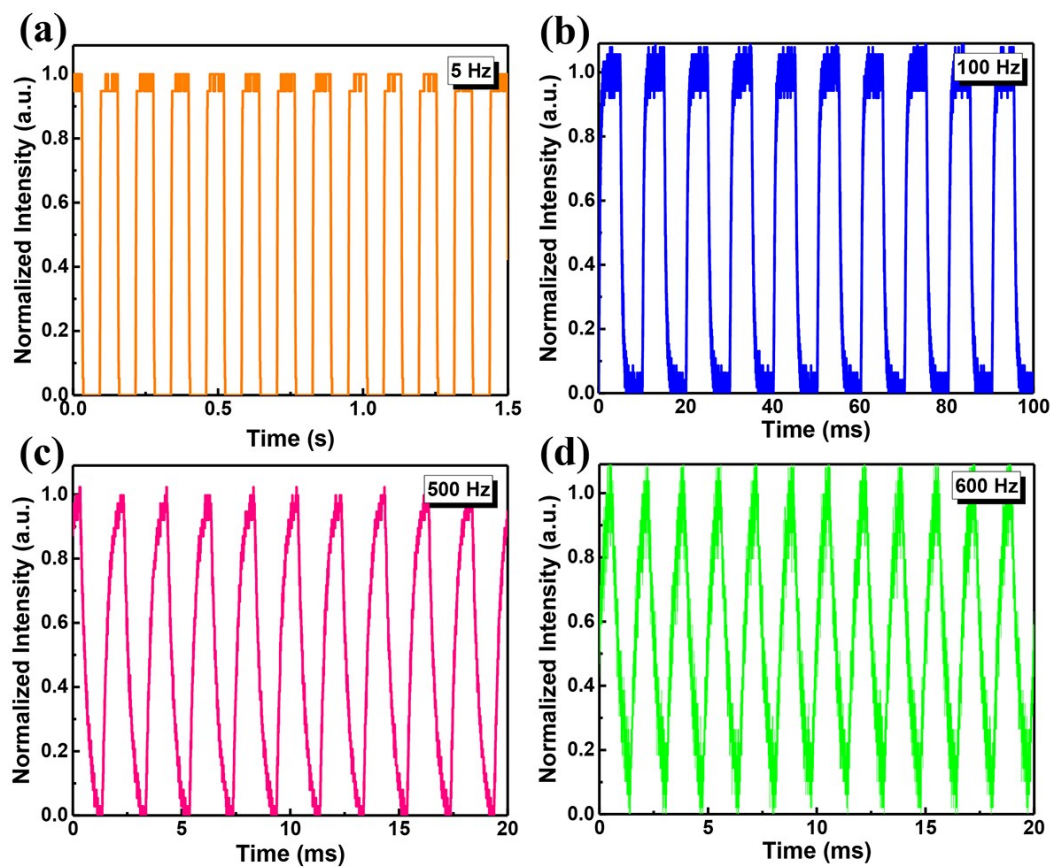

Figure S7. Photoresponse characteristics of the photodetector under pulsed light illumination at frequencies of (a) 5 Hz, (b) 100 Hz, (c) 500 Hz, and (d) 600 Hz, respectively.
